# Supplementary material
Source: publisher figshare collection journal article supplement (https://frontiersin.figshare.com/ndownloader/files/13205924)
Supplement: Supplementary file 2 [file 13205924]

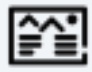

## Dataset

### Status

**I N R E V I E W:** Pittore, Massimiliano; Haas, Michael; Megalooikonomou, Konstantinos (2018): RRVS Building survey for exposure modelling in Alsace (France). V. 1.0. GFZ German Research Centre for Geosciences. <http://doi.org/10.5880/GFZ.2.6.2018.002>

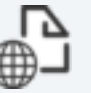

Released

### Data Files

[RRVS\\_survey\\_Alsace\\_Destress\\_20180321.csv](#) 732  
54 Bytes

License: [CC BY-SA 4.0](#)

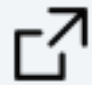

### Data Description

Supplement to

[http://dx.doi.org/Pittore et al., \(2018\). Risk-oriented, bottom-up modelling of building portfolios with faceted taxonomies, Frontiers in Built Environment](http://dx.doi.org/Pittore et al., (2018). Risk-oriented, bottom-up modelling of building portfolios with faceted taxonomies, Frontiers in Built Environment)

### Related Work

References

<https://taxonomy.openquake.org>

Brzev S., C. Scawthorn, A.W. Charleson, L. Allen, M. Greene, K. Jaiswal, V. Silva (2013) GEM Building Taxonomy Version 2.0. GEM Technical Report 2013-02, Version: 1.0.0. URL: <https://www.globalquake-model.org/single-post/2017/05/17/GEM-Building-Taxonomy-Version-20>

### Find More Research Data

<http://bib.telegrafenberg.de/finden/datenbanken/forschungsdaten/>

### Abstract

The dataset contains a set of structural and non-structural attributes collected using the GFZ RRVS (Remote Rapid Visual Screening) methodology in Alsace, France, within the framework of the DESTRESS project. The survey has been carried out between May and June 2017 using a Remote Rapid Visual Screening system developed by GFZ and employing omnidirectional images from Google StreetView (vintage: February 2011) and footprints from OpenStreetMap. Surveyor: Konstantinos G. Megalooikonomou (GFZ German Research Centre for Geosciences) The attributes are encoded according to the GEM taxonomy v2.0 (see <https://taxonomy.openquake.org>"><https://taxonomy.openquake.org>)

The following attributes are defined (not all are observable in the RRVS survey):  
code,description

lon, longitude in fraction of degrees  
lat, latitude in fraction of degrees  
object\_id, unique id of the building surveyed  
MAT\_TYPE,Material Type  
MAT\_TECH,Material Technology  
MAT\_PROP,Material Property  
LLRS,Type of Lateral Load-Resisting System  
LLRS\_DUCT,System Ductility  
HEIGHT,Height  
YR\_BUILT,Date of Construction or Retrofit  
OCCUPY,Building Occupancy Class - General  
OCCUPY\_DT,Building Occupancy Class - Detail  
POSITION,Building Position within a Block  
PLAN\_SHAPE,Shape of the Building Plan  
STR\_IRREG,Regular or Irregular  
STR\_IRREG\_DT,Plan Irregularity or Vertical Irregularity  
STR\_IRREG\_TYPE,Type of Irregularity  
NONSTRCEXW,Exterior walls  
ROOF\_SHAPE,Roof Shape  
ROOFCOVMAT,Roof Covering  
ROOFSYSMAT,Roof System Material  
ROOFSYSTYP,Roof System Type  
ROOF\_CONN,Roof Connections  
FLOOR\_MAT,Floor Material  
FLOOR\_TYPE,Floor System Type  
FLOOR\_CONN,Floor Connections

### Dataset Contact

[Pittore Massimiliano](#); GFZ German Research Centre for Geosciences, Potsdam, Germany;

### Keywords

geological process > seismic activity, risk > natural risk, safety > risk assessment > disaster preparedness, safety > risk assessment > natural risk analysis, safety > risk assessment > risk exposure, induced seismicity, taxonomy, RRVS, GEM

### More Metadata

iso19115: [view inline](#) / [download xml](#)  
datacite: [view inline](#) / [download xml](#)  
dif: [view inline](#) / [download xml](#)  
escidoc: [view inline](#) / [download xml](#)

### Location

Click/hover over markers or bounding boxes to see related details. Click/hover over details to see related marker or bounding box.

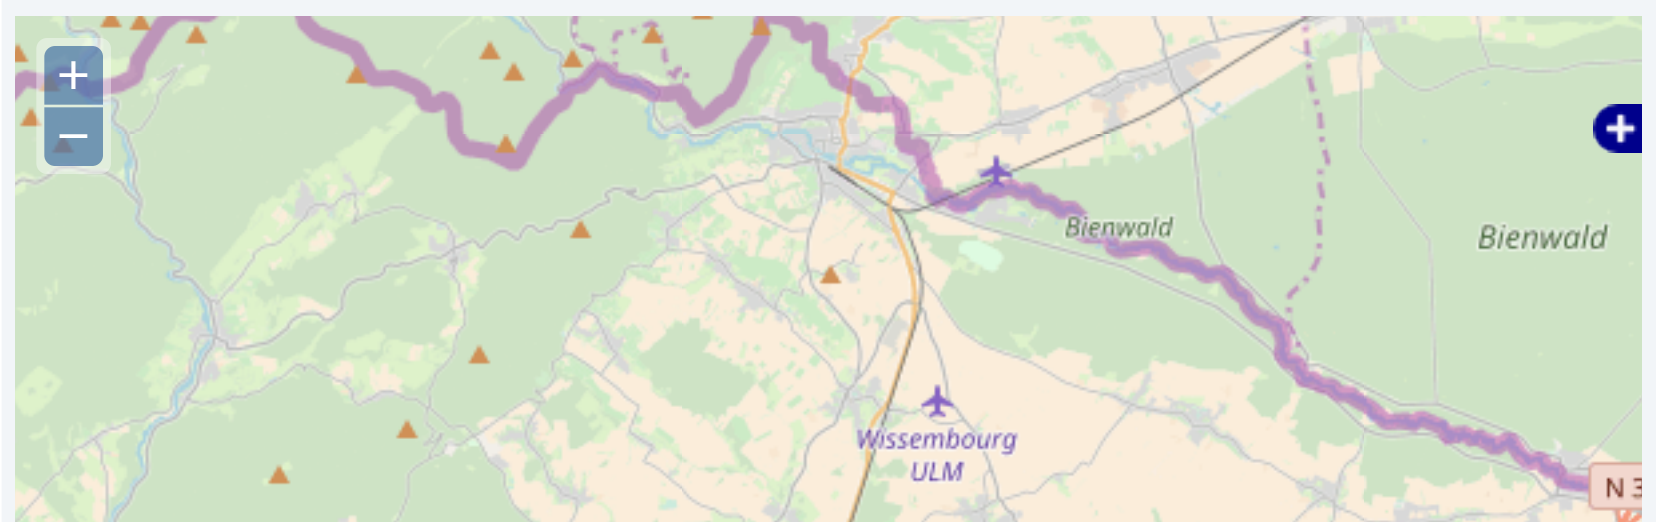

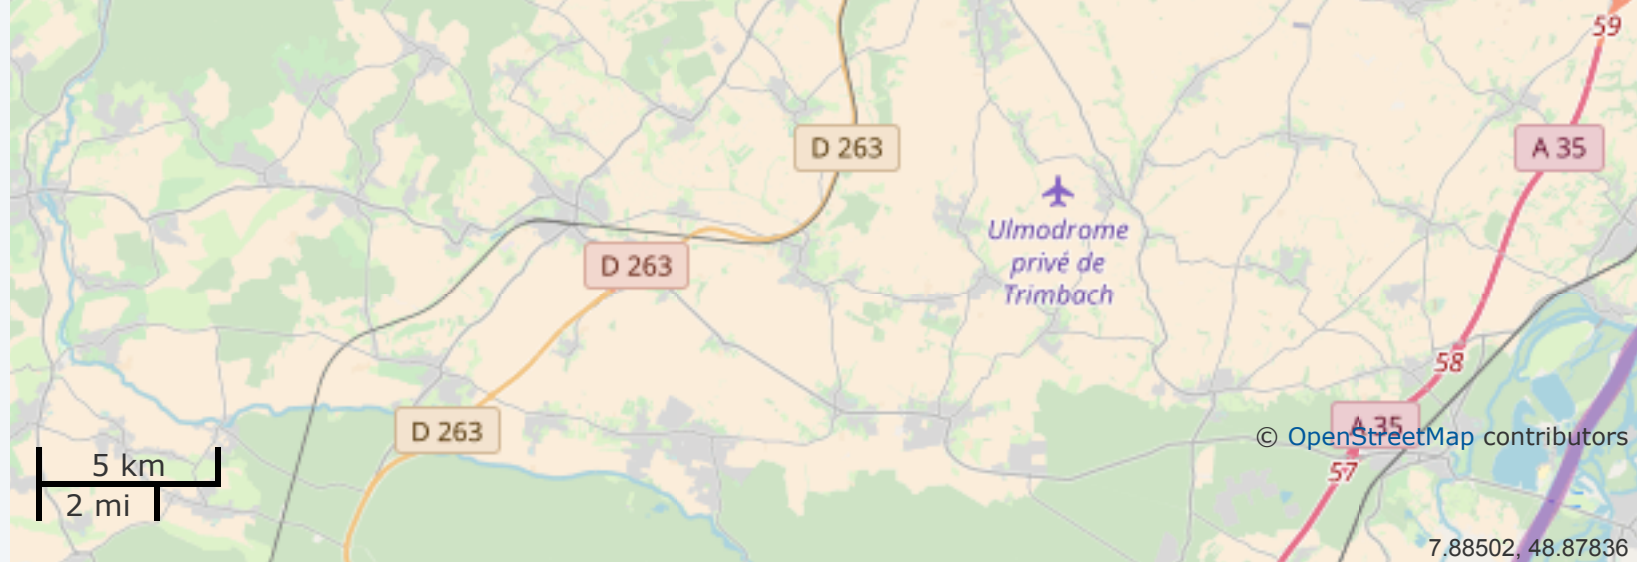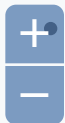

**Time span of the actual RRVS survey**

48.96580  
7.86419 7.95077  
48.89140

• **Vintage of the GoogleStreet images used in the survey**

48.96580  
7.86419 7.95077  
48.89140

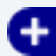

Start (Date/Time): 2017-06-01

End (Date/Time): 2017-07-01
